# Supplementary material
Source: Research Square preprint supplement (doi:10.21203/rs.3.rs-9556003/v1)
Supplement: Supplementary file 1 [file 12d0a2bc3ba3e974f7ffbab7.docx]

***Supplementary materials***

|  | **Spearman ρ** | **p-value** | **95% CI** |
| --- | --- | --- | --- |
| ICV (cm³) | 0.39 | 0.003 | [0.13, 0.60] |
| CSF (cm³) | -0.03 | 0.848 | [-0.26, 0.22] |
| ea-CSF (cm³) | 0.04 | 0.796 | [-0.21, 0.28] |
| PSD Total (cm³) | -0.01 | 0.953 | [-0.27, 0.22] |
| PSD Prefrontal (cm³) | -0.06 | 0.644 | [-0.31, 0.18] |
| PSD Fronto-Parietal (cm³) | 0.03 | 0.830 | [-0.24, 0.27] |
| PSD Occipital (cm³) | -0.10 | 0.466 | [-0.35, 0.17] |

**Table S1:** Spearman rank correlations (ρ) between age, brain volume measures (intracranial volume[ICV], cerebrospinal fluid [CSF], and extra-axial CSF [ea-CSF]) and PSD volumes, p-values and corresponding 95% confidence intervals (CIs), in ASD children.

|  | **Spearman ρ** | **p-value** | **95% CI** |
| --- | --- | --- | --- |
| ICV (cm³) | 0.22 | 0.05 | [-0.05, 0.46] |
| CSF (cm³) | -0.17 | 0.184 | [-0.43, 0.10] |
| ea-CSF (cm³) | -0.18 | 0.159 | [-0.43, 0.09] |
| PSD Total (cm³) | -0.05 | 0.725 | [-0.21, 0.29] |
| PSD Prefrontal (cm³) | 0.01 | 0.965 | [-0.25, 0.26] |
| PSD Fronto-Parietal (cm³) | 0.02 | 0.852 | [-0.22, 0.26] |
| PSD Occipital (cm³) | -0.11 | 0.420 | [-0.16, 0.35] |

**Table S2:** Spearman rank correlations (ρ) between age, brain volume measures (intracranial volume[ICV], cerebrospinal fluid [CSF], and extra-axial CSF [ea-CSF]) and PSD volumes, p-values and corresponding 95% confidence intervals (CIs), in TD children.

*
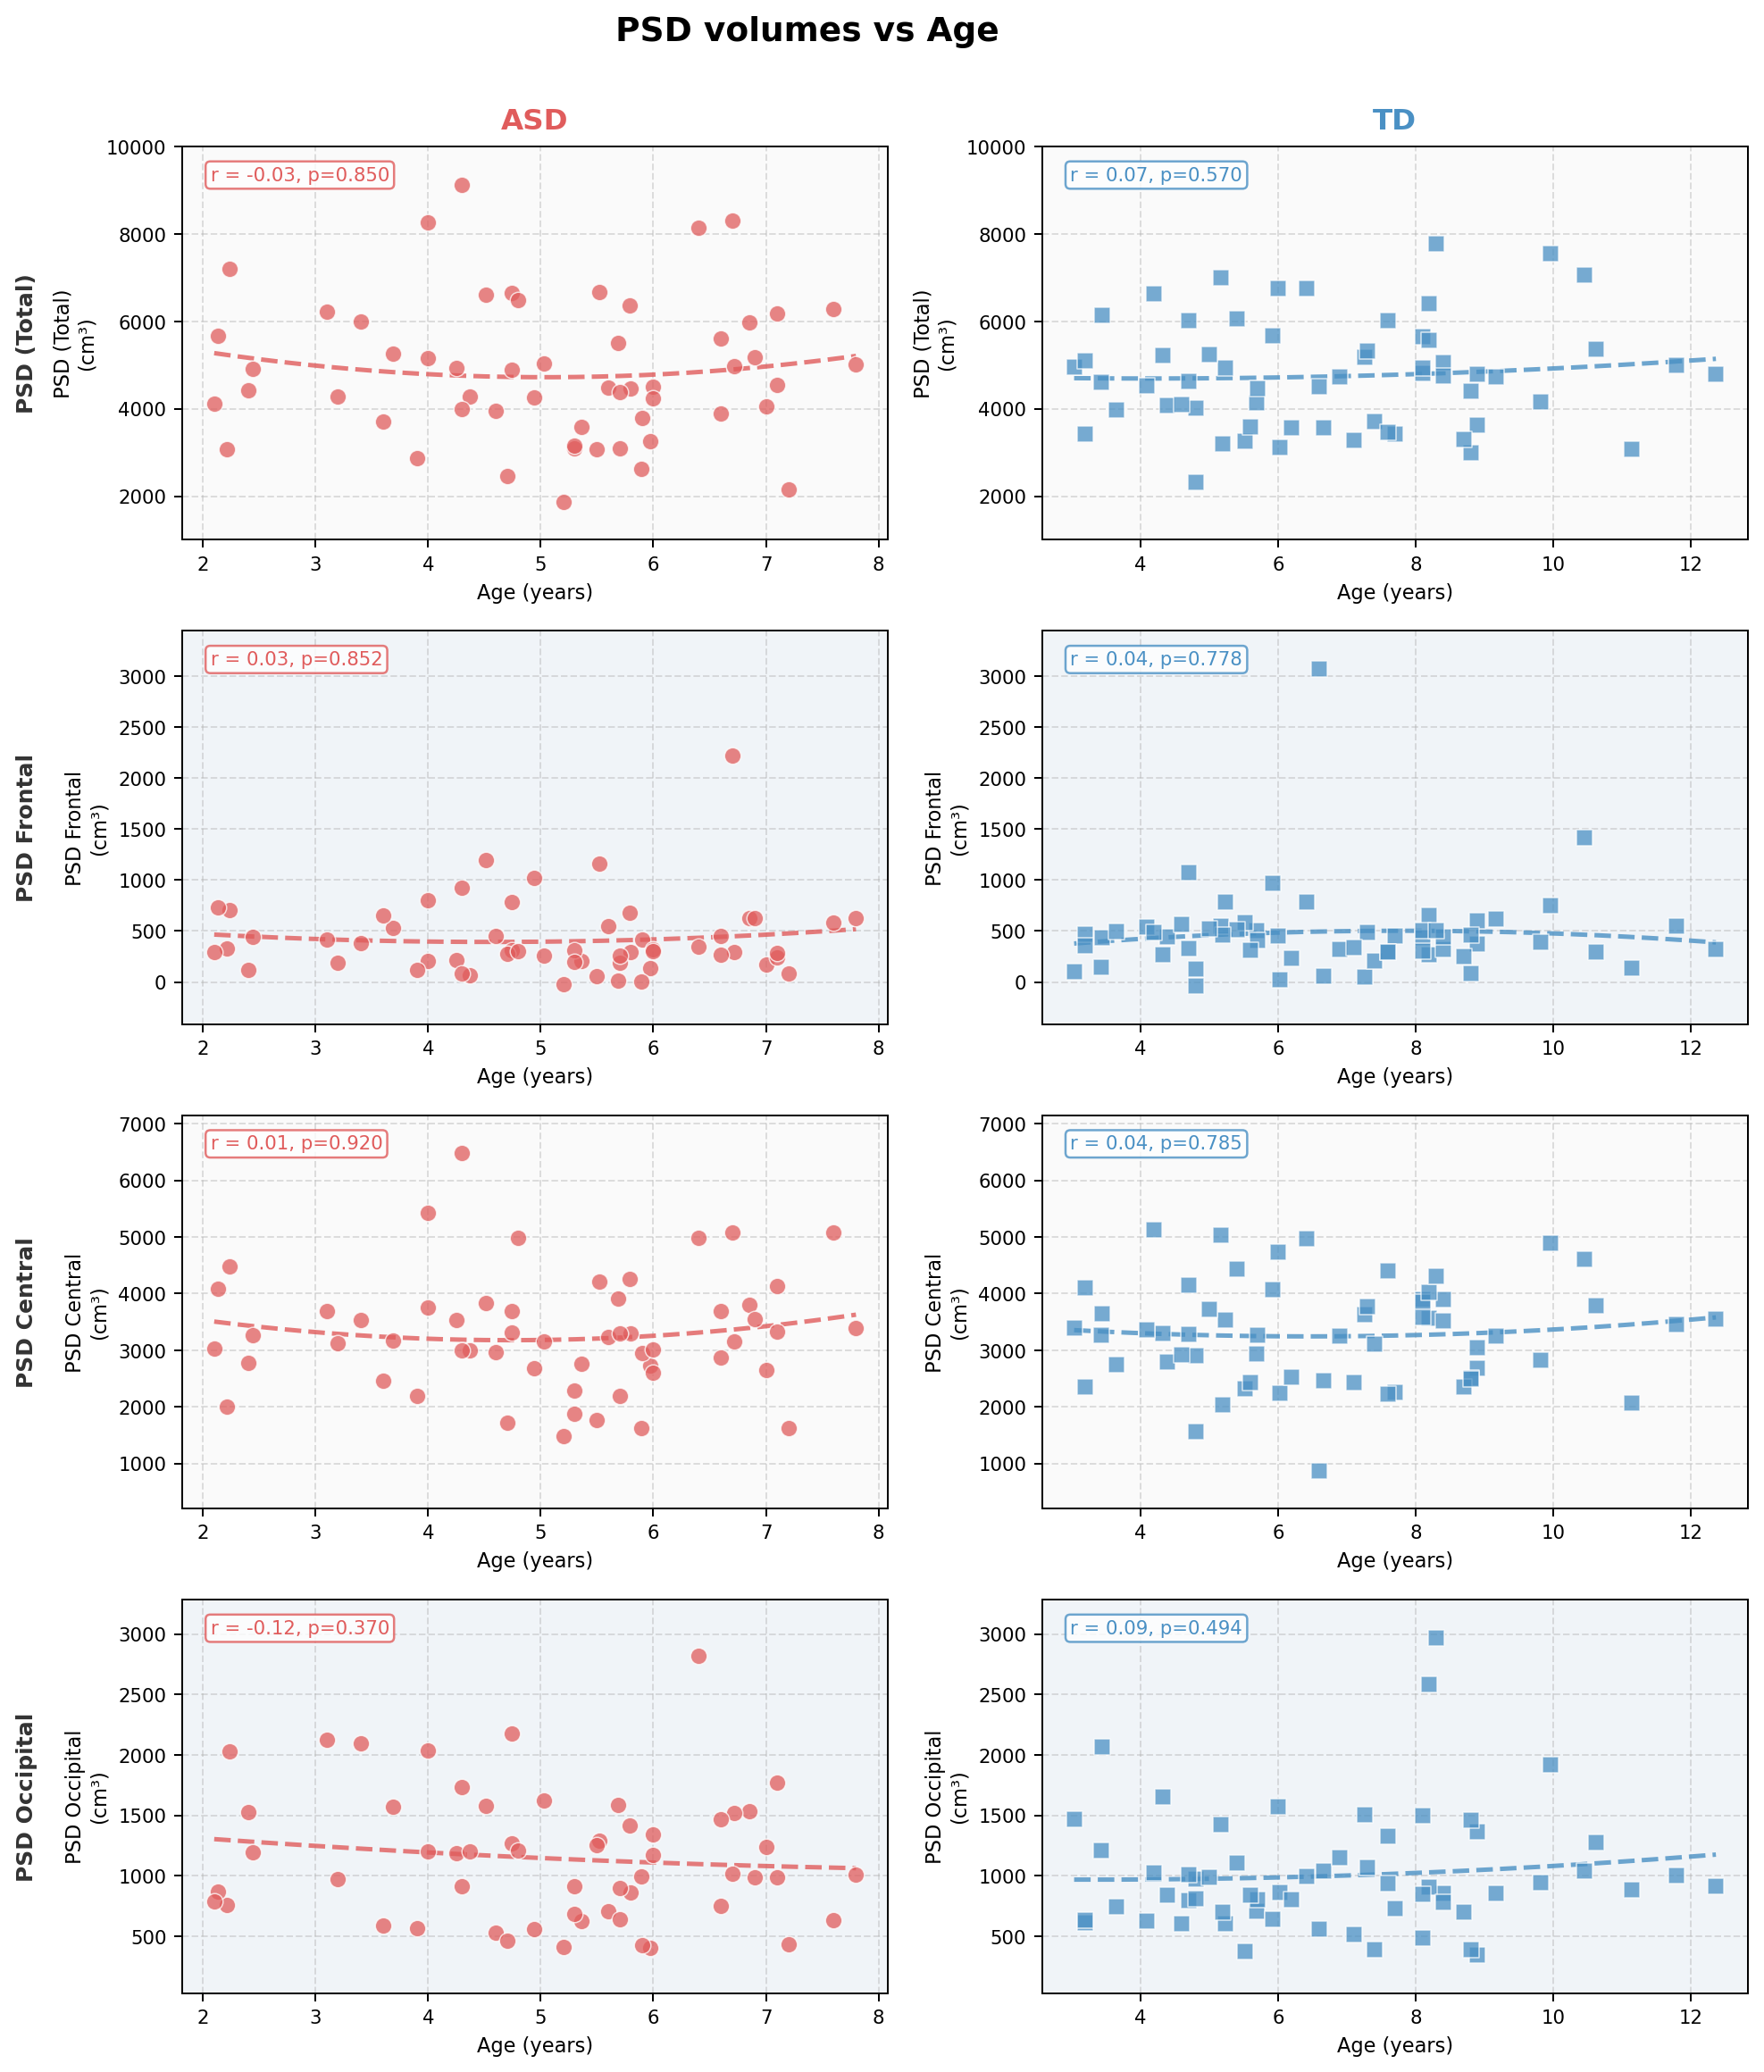
*

**Figure S1:** Scatter plots of total and regional PSD volumes (prefrontal, fronto-parietal, and occipital) as a function of age in the ASD and TD groups. Each panel shows individual data points with a fitted quadratic curve (dashed line) and Spearman correlation coefficient (r) with corresponding p-value. No significant linear or non-linear age-related effects were observed in either group.

|  | **Coefficient (β)** | **Std_Error** | **p_value** | **95% CI** |
| --- | --- | --- | --- | --- |
| C(Group)[T.TD] | -0.002 | 0.290 | 0.995 | [−0.576, 0.572] |
| C(Sex)[T.M] | 0.364 | 0.279 | 0.194 | [−0.188, 0.916] |
| Age | 0.008 | 0.065 | 0.902 | [−0.121, 0.137] |
| CSF | 0.016 | 0.004 | <0.001 | [0.008, 0.024] |

**Table S3:** Linear regression analysis of PSD Total volume including diagnostic group (ASD vs TD), age, sex, and CSF as covariates. Reported are regression coefficients (β), standard errors (Std_Error), p-values, and 95% confidence intervals (95% CI).

|  | **Coefficient (β)** | **Std_Error** | **p_value** | **95% CI** |
| --- | --- | --- | --- | --- |
| C(Group)[T.TD] | 0.046 | 0.087 | 0.597 | [−0.127, 0.219] |
| C(Sex)[T.M] | 0.035 | 0.084 | 0.680 | [−0.132, 0.201] |
| Age | 0.006 | 0.020 | 0.772 | [−0.033, 0.045] |
| CSF | 0.001 | 0.001 | 0.536 | [−0.002, 0.003] |

**Table S4:** Linear regression analysis of PSD Prefrontal volume including diagnostic group (ASD vs TD), age, sex, and CSF as covariates. Reported are regression coefficients (β), standard errors (Std_Error), p-values, and 95% confidence intervals (95% CI).

|  | **Coefficient (β)** | **Std_Error** | **p_value** | **95% CI** |
| --- | --- | --- | --- | --- |
| C(Group)[T.TD] | 0.075 | 0.196 | 0.701 | [−0.313, 0.464] |
| C(Sex)[T.M] | 0.269 | 0.189 | 0.157 | [−0.105, 0.642] |
| Age | 0.004 | 0.044 | 0.934 | [−0.084, 0.091] |
| CSF | 0.010 | 0.003 | 0.001 | [0.004, 0.015] |

**Table S5:** Linear regression analysis of PSD Frontoparietal volume including diagnostic group (ASD vs TD), age, sex, and CSF as covariates. Reported are regression coefficients (β), standard errors (Std_Error), p-values, and 95% confidence intervals (95% CI).

|  | **Coefficient (β)** | **Std_Error** | **p_value** | **95% CI** |
| --- | --- | --- | --- | --- |
| C(Group)[T.TD] | -0.124 | 0.106 | 0.247 | [−0.334, 0.087] |
| C(Sex)[T.M] | 0.061 | 0.102 | 0.554 | [−0.142, 0.263] |
| Age | -0.001 | 0.024 | 0.957 | [−0.049, 0.046] |
| CSF | 0.005 | 0.001 | 0.001 | [0.002, 0.008] |

**Table S6:** Linear regression analysis of PSD Occipital volume including diagnostic group (ASD vs TD), age, sex, and CSF as covariates. Reported are regression coefficients (β), standard errors (Std_Error), p-values, and 95% confidence intervals (95% CI).

|  | **Coefficient (β)** | **Std_Error** | **p_value** | **95% CI** |
| --- | --- | --- | --- | --- |
| C(Group)[T.TD] | -0.061 | 0.291 | 0.833 | [−0.638, 0.515] |
| C(Sex)[T.M] | 0.268 | 0.288 | 0.354 | [−0.303, 0.840] |
| Age | -0.002 | 0.079 | 0.983 | [−0.159, 0.156] |
| CSF | 0.018 | 0.005 | <0.001 | [0.009, 0.027] |

**Table S7:** Results of the linear regression model for PSD volume in the age-matched sample, including diagnostic group (ASD vs TD), age, sex, and CSF as covariates. Reported are regression coefficients (β), standard errors (Std_Error), p-values, and 95% confidence intervals (95% CI).
